# Supplementary material for: Long noncoding RNAs and metabolic memory associated with continued progression of diabetic retinopathy
Source: PubMed Central journal article supplement (PMC11574110; doi:10.1111/1753-0407.70009), 2024-11-18
Supplement: JDB-16-e70009-s001.pdf [file JDB-16-e70009-s001.pdf]

**Table S1**

## Functional details of LncRNAs

| LncRNA              | Transcript | Sequence                                                                         | Relationship           | Regulation | Function of the related genes ( <a href="http://RatGenomeDatabase.mcw.edu">Rat Genome Database (mcw.edu)</a> )         |
|---------------------|------------|----------------------------------------------------------------------------------|------------------------|------------|------------------------------------------------------------------------------------------------------------------------|
| <i>LOC100362486</i> | XR_347139  | CAAAACGATTT<br>ATTACTGCAAC<br>ACAAGCAGGC<br>TACAATACACTT<br>CATACATTTCTT<br>TGGT | intergenic             | down       | von Willebrand's disease 1 (ortholog); interacts with aflatoxin B1 (ortholog).                                         |
| <i>Ankef1</i>       | XR_591690  | TTCGAAAAAAA<br>TATGACATCAAT<br>CACCCCCGTG<br>ATGTTGAACAA<br>AATATTCAGTG<br>TTTCT | exon sense-overlapping | down       | Interacts with 1-naphthyl isothiocyanate; 2,3,7,8-Tetrachlorodiben zofuran.                                            |
| <i>Csnk1d</i>       | XR_594964  | GGCCCCAGCG<br>GCCTCTGACC<br>GGGCTTCCAG<br>CCACGCAGGC<br>CGCCACCGGC<br>CACAGGGCAG | bidirectional          | down       | Located in the centrosome and perinuclear region of cytoplasm; cellular response to nerve growth factor stimulus.      |
| <i>Ankle1</i>       | XR_341037  | ACGTCCCAAG<br>GGTGCTGGAC<br>ACCATCCTTGG<br>GTCCCCACATC<br>CTCCGCAGGAT<br>GCCAGGG | exon sense-overlapping | down       | Enables DNA endonuclease; negative regulation of mitotic recombination; hematopoietic progenitor cell differentiation. |
| <i>Gpr61</i>        | XR_351942  | TCATAGTCCAG<br>ACTAATATTTAT<br>ACTGAGACAAG<br>GACTGGCCTC<br>CCTGATCTATC<br>TCCTC | exon sense-overlapping | down       | G protein-coupled receptor activity and arrestin family protein binding activity.                                      |
| <i>Nprl3</i>        | XR_357451  | CGTCGCTCGG<br>TGAAGTCTCGC<br>GAGAGTGAGC                                          | exon sense-overlapping | down       | TORC1 signaling and cellular response to                                                                               |

|                     |           |                                                                                  |                        |      |                                                                                                                                                                       |
|---------------------|-----------|----------------------------------------------------------------------------------|------------------------|------|-----------------------------------------------------------------------------------------------------------------------------------------------------------------------|
|                     |           | GCCGTGGTGG<br>AGGCACCCGC<br>TTCCCCGGT                                            |                        |      | amino acid starvation.                                                                                                                                                |
| <i>Fancg</i>        | XR_346463 | TGAAGGCACC<br>GGTGGGACCA<br>GCCTCCACCC<br>ATCGGAAGACC<br>CCTTCGTAACG<br>GTGATCTA | exon sense-overlapping | down | DNA damage response and mitochondrion organization.                                                                                                                   |
| <i>LOC100361265</i> | XR_597622 | CTTCCGGTGG<br>CTTTCCCAAGA<br>CCAGTCCTAGA<br>AAGAAGCCAC<br>CCTCAGAAAAG<br>CCATCTC | exon sense-overlapping | down | Orthologous to several human genes including chromosome X open reading frame 49; interacts with clozapine (ortholog) and valproic acid (ortholog).                    |
| <i>Ccdc70</i>       | XR_596526 | CAGCTAAGCAG<br>GTTTGGCCAAC<br>TGACCTGGAC<br>GTGGCCAACA<br>GCCCTGACCT<br>CCAACACA | exon sense-overlapping | down | Located in the plasma membrane. Orthologous to human CCDC70; interacts with bisphenol A; 1,2-dichloroethane (ortholog); 2,2',4,4',5,5'-hexachlorobiphenyl (ortholog). |
| <i>Tchhl1</i>       | XR_145852 | GAAGAGAGAG<br>AGGAGTGACA<br>GTCTGAGCTCA<br>AGGACCAAAA<br>GAGGCCCAGG<br>GGAGCTATG | exon sense-overlapping | up   | Calcium ion binding activity and transition metal ion binding activity.                                                                                               |
| <i>Efcab1</i>       | XR_595172 | TTGACCAAAAT<br>AAGTTTGAGAA<br>ATGCCCTTCAG<br>AGAGAGAGAC<br>GGCTAGGGAA<br>GCAGAAG |                        | up   | Calcium ion binding activity and regulation of flagellated sperm motility.                                                                                            |
| <i>Slc7a6</i>       | XR_597221 | CTTTGTGAGTG<br>TGCAAGATCCC                                                       | exon sense-overlapping | up   | L-lysine: L-arginine                                                                                                                                                  |

|                            |                   |                                                                                  |                        |    |                                                                                                                            |
|----------------------------|-------------------|----------------------------------------------------------------------------------|------------------------|----|----------------------------------------------------------------------------------------------------------------------------|
|                            |                   | GAGTGTGAGG<br>GGGACTGTGT<br>GTGGGAAA<br>ACTGCGAGAT                               |                        |    | antiporter activity and arginine binding activity.                                                                         |
| <i>Prpf4b</i>              | XR_596685         | CTGTTTGTCTC<br>CCTGAGGATTA<br>TGGAGAACAAT<br>AACATTTGGGG<br>GTTTAAATAGTA<br>TTTT | exon sense-overlapping | up | Cyclin-dependent protein serine/threonine kinase activity and mRNA cis splicing via spliceosome; regulation of cell cycle. |
| <i>Srsf2</i>               | XR_358012         | TAAGAGAATGC<br>TGCGGTCTCCT<br>GTTTGATAAAA<br>GAATATTGGCC<br>AGTATTGCAGA<br>TTTTA | exon sense-overlapping | up | Enables protein kinase C binding activity; involved in response to vitamin E.                                              |
| <i>LOC100911891</i>        | XR_354153         | GAGGAGGGAG<br>GACAACCTGTG<br>GATCTTCACTT<br>GATCAACAATG<br>CAGTTGCCAAT<br>GTAATT | intergenic             | up | Not available                                                                                                              |
| <i>ENSRN OG00000052421</i> | ENSRNOT0000079148 | AGGTGTCTTGC<br>CTCTGTCTCCC<br>GAGTGAGTTTT<br>GACATTAAAGG<br>TGTATCACCAC<br>TAGGT | intergenic             | up | Histone-lysine N-methyltransferase SETDB1-like; LOC689873; similar to Histone H3-K9 HMT.                                   |
| <i>lkbke</i>               | XR_595428         | CCGGAATAAGC<br>TAGAAATCCGG<br>GGAGGTGGTT<br>GCTGTAAAGGT<br>CTTCAACTCAG<br>CCAGCT | exon sense-overlapping | up | Ikappa B kinase activity; K48-linked polyubiquitin modification-dependent protein binding activity.                        |
| <i>MALAT1</i>              | FQ233546          | Not available                                                                    | Intergenic             | up | Cellular response to hypoxia; positive regulation of cardiac muscle myoblast                                               |

|               |               |                                                                                  |            |      |                                                                                                                                                              |
|---------------|---------------|----------------------------------------------------------------------------------|------------|------|--------------------------------------------------------------------------------------------------------------------------------------------------------------|
|               |               |                                                                                  |            |      | proliferation; associated with the oxidative stress in the mitochondria; proliferation and metastasis of tumor cells.                                        |
| <i>NEAT1</i>  | Not available | Not available                                                                    | Intergenic | up   | Located in the paraspeckles; acts upstream of, or within, cellular component maintenance; affects mitochondrial dynamics and function                        |
| <i>HOTAIR</i> | NR_132646     | CCACAGCTGG<br>GAGATTAATCA<br>ACCACACTGAA<br>AATGGGGGGA<br>GGGGAAGGAA<br>GAGTTGGA | intergenic | up   | Acts upstream of, or within, hindlimb morphogenesis; post-anal tail morphogenesis; , regulation of histone methylation.                                      |
| <i>Meg3</i>   | NR_131064     | Not available                                                                    | intergenic | down | Chromatin organization; acts upstream of, or within, SMAD protein signal transduction; genomic imprinting.                                                   |
| <i>CARL</i>   | NR_131254     | Not available                                                                    | intergenic | up   | Located in the cytoplasm; enables pre-miRNA binding activity; acts upstream of, or within, cellular response to anoxia; negative regulation of mitochondrial |

|                      |               |               |           |           |                                                                                                                                                                                                                                                   |
|----------------------|---------------|---------------|-----------|-----------|---------------------------------------------------------------------------------------------------------------------------------------------------------------------------------------------------------------------------------------------------|
|                      |               |               |           |           | fission; miRNA metabolic process.                                                                                                                                                                                                                 |
| <i>CytB</i>          | Not available | Not available | antisense | down      | Located in the mitochondrial inner membrane; contributes to ubiquinol-cytochrome-c reductase activity; involved in electron transport chain; biomarker of thyrotoxicosis; type 2 diabetes mellitus; maintains mitochondrial genome and stability. |
| <i>ND5 &amp; ND6</i> | Not available | Not available | antisense | no change | Located in the mitochondrial inner membrane; a part of mitochondrial respiratory chain complex I; enables NADH dehydrogenase activity; involved in response to hydrogen peroxide, hypoxia and organonitrogen compound.                            |
