# Supplementary material for: Long noncoding RNAs and metabolic memory associated with continued progression of diabetic retinopathy
Source: PubMed Central journal article supplement (PMC11574110; doi:10.1111/1753-0407.70009), 2024-11-18

**Figure S1.** KEGG pathways analysis of differentially expressed LncRNAs.

Top KEGG pathways corresponding to (A) downregulated and (B) upregulated retinal LncRNAs in Diab vs Norm and Rev vs Norm groups.

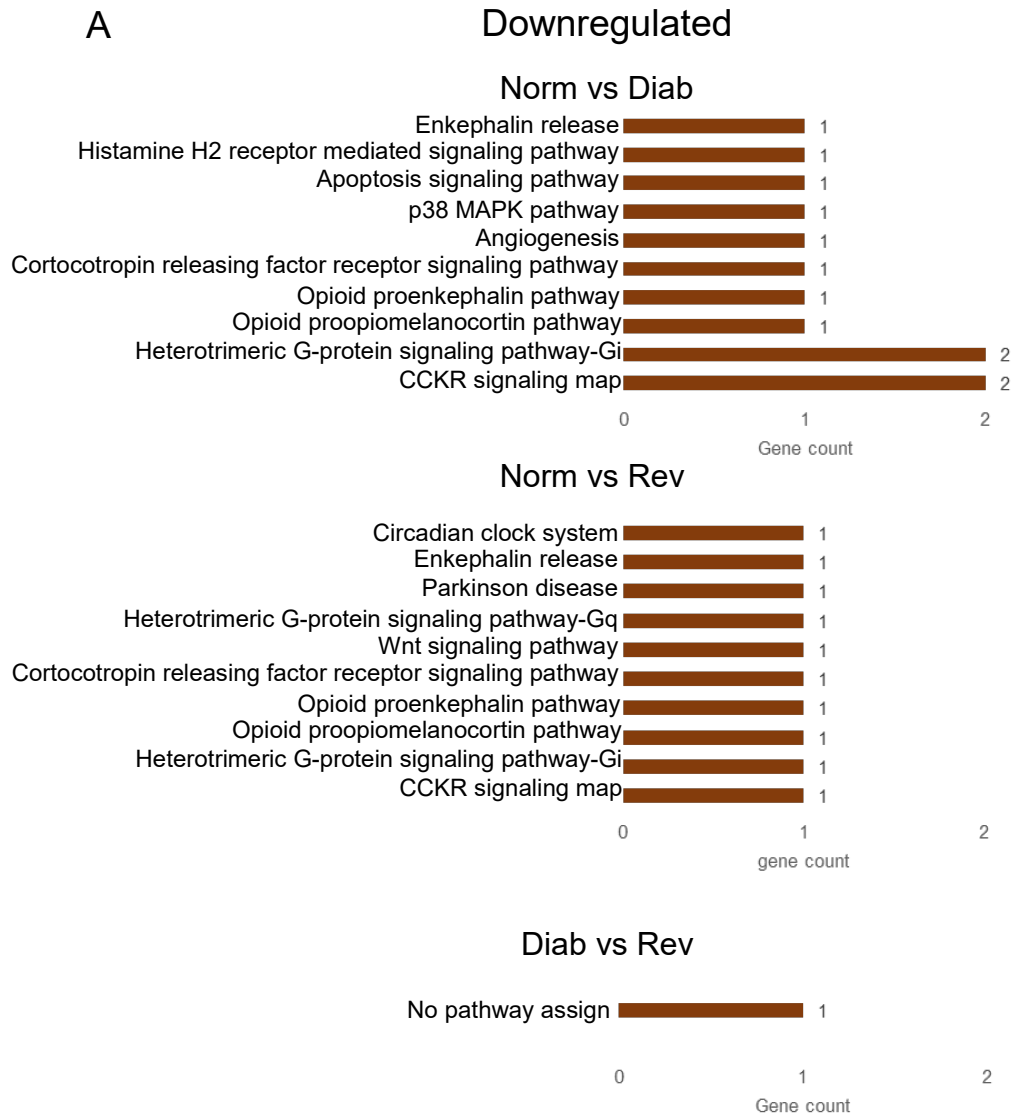

## B Upregulated

### Norm vs Diab

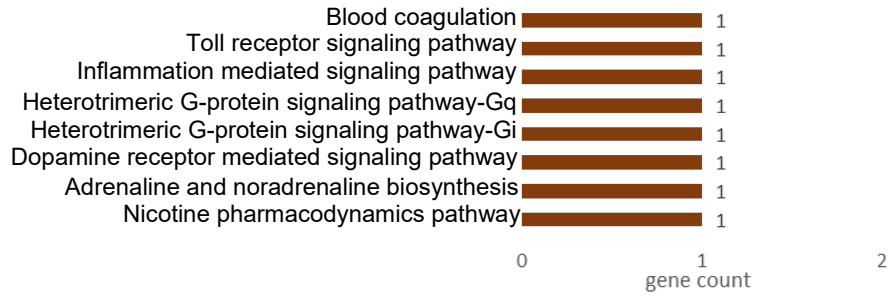

### Norm vs Rev

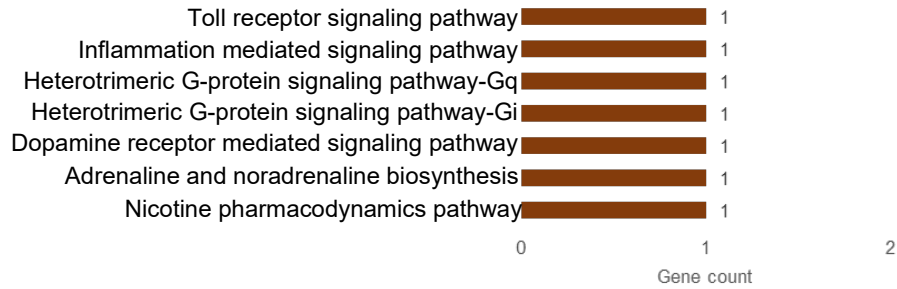

### Diab vs Rev

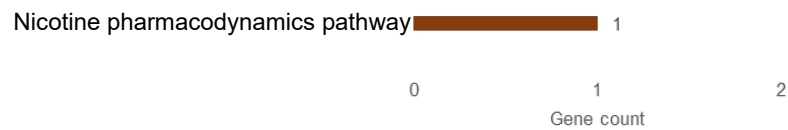

Supplement: JDB-16-e70009-s002.pdf [file JDB-16-e70009-s002.pdf]
